# Supplementary material for: Impaired telomere pathway and fertility in Senescence-Accelerated Mice Prone 8 females with reproductive senescence
Source: publisher site journal article supplement (doi:10.18632/aging.204731), 2023-05-23
Supplement: Supplementary file [file aging-v15i11-204731-supplementary-material-SD2.pdf]

## SUPPLEMENTARY TABLES

**Supplementary Table 1. Individual survival in SAMP8 and SAMR1 mice.**

| <b>Mice code</b> | <b>Model</b> | <b>Sex</b> | <b>Age at death (weeks)</b> |
|------------------|--------------|------------|-----------------------------|
| SAMP8-01         | SAMP8        | Female     | 35.57                       |
| SAMP8-02         | SAMP8        | Female     | 37                          |
| SAMP8-03         | SAMP8        | Female     | 37.86                       |
| SAMP8-04         | SAMP8        | Female     | 43.71                       |
| SAMP8-05         | SAMP8        | Male       | 51                          |
| SAMP8-06         | SAMP8        | Male       | 32.14                       |
| SAMP8-07         | SAMP8        | Male       | 61.71                       |
| SAMP8-08         | SAMP8        | Female     | 59.86                       |
| SAMP8-09         | SAMP8        | Female     | 96                          |
| SAMP8-10         | SAMP8        | Female     | 78                          |
| SAMP8-11         | SAMP8        | Female     | 73                          |
| SAMP8-12         | SAMP8        | Female     | 60                          |
| SAMP8-13         | SAMP8        | Female     | 60                          |
| SAMP8-14         | SAMP8        | Female     | 64.14                       |
| SAMP8-15         | SAMP8        | Female     | 57.86                       |
| SAMP8-16         | SAMP8        | Female     | 51.14                       |
| SAMP8-17         | SAMP8        | Female     | 76                          |
| SAMP8-18         | SAMP8        | Female     | 81.14                       |
| SAMP8-19         | SAMP8        | Female     | 57.14                       |
| SAMP8-20         | SAMP8        | Female     | 55.71                       |
| SAMP8-21         | SAMP8        | Female     | 78.71                       |
| SAMP8-22         | SAMP8        | Male       | 88.86                       |
| SAMP8-23         | SAMP8        | Male       | 71.14                       |
| SAMP8-24         | SAMP8        | Male       | 88.86                       |
| SAMP8-25         | SAMP8        | Male       | 97.86                       |
| SAMP8-26         | SAMP8        | Male       | 89                          |
| SAMP8-27         | SAMP8        | Male       | 83                          |
| SAMP8-28         | SAMP8        | Male       | 46                          |
| SAMP8-29         | SAMP8        | Male       | 79.14                       |
| SAMP8-30         | SAMP8        | Male       | 73.71                       |
| SAMP8-31         | SAMP8        | Male       | 73.71                       |
| SAMP8-32         | SAMP8        | Male       | 83                          |
| SAMP8-33         | SAMP8        | Male       | 102                         |
| SAMP8-34         | SAMP8        | Male       | 79.86                       |
| SAMP8-35         | SAMP8        | Male       | 85                          |
| SAMP8-36         | SAMP8        | Male       | 75.14                       |
| SAMP8-37         | SAMP8        | Male       | 59.14                       |
| SAMP8-38         | SAMP8        | Female     | 78.29                       |

|          |       |        |        |
|----------|-------|--------|--------|
| SAMR1-01 | SAMR1 | Female | 17.86  |
| SAMR1-02 | SAMR1 | Male   | 43.57  |
| SAMR1-03 | SAMR1 | Female | 52     |
| SAMR1-04 | SAMR1 | Female | 99.86  |
| SAMR1-05 | SAMR1 | Female | 119.29 |
| SAMR1-06 | SAMR1 | Female | 102.43 |
| SAMR1-07 | SAMR1 | Female | 100.71 |
| SAMR1-08 | SAMR1 | Female | 109.71 |
| SAMR1-09 | SAMR1 | Female | 116.57 |
| SAMR1-10 | SAMR1 | Female | 92.71  |
| SAMR1-11 | SAMR1 | Female | 92.29  |
| SAMR1-12 | SAMR1 | Female | 87.71  |
| SAMR1-13 | SAMR1 | Female | 83.71  |
| SAMR1-14 | SAMR1 | Female | 130.43 |
| SAMR1-15 | SAMR1 | Female | 100    |
| SAMR1-16 | SAMR1 | Female | 93     |
| SAMR1-17 | SAMR1 | Female | 79     |
| SAMR1-18 | SAMR1 | Female | 95.14  |
| SAMR1-19 | SAMR1 | Female | 98.14  |
| SAMR1-20 | SAMR1 | Female | 133.14 |
| SAMR1-21 | SAMR1 | Male   | 112.29 |
| SAMR1-22 | SAMR1 | Male   | 125.71 |
| SAMR1-23 | SAMR1 | Male   | 109.86 |
| SAMR1-24 | SAMR1 | Male   | 143.14 |
| SAMR1-25 | SAMR1 | Male   | 108.71 |
| SAMR1-26 | SAMR1 | Male   | 133.14 |
| SAMR1-27 | SAMR1 | Male   | 143.86 |
| SAMR1-28 | SAMR1 | Male   | 134    |
| SAMR1-29 | SAMR1 | Male   | 116.14 |
| SAMR1-30 | SAMR1 | Male   | 101.14 |
| SAMR1-31 | SAMR1 | Male   | 122.86 |
| SAMR1-32 | SAMR1 | Male   | 136.86 |
| SAMR1-33 | SAMR1 | Male   | 143.86 |
| SAMR1-34 | SAMR1 | Male   | 115    |
| SAMR1-35 | SAMR1 | Male   | 106.43 |
| SAMR1-36 | SAMR1 | Male   | 105.86 |
| SAMR1-37 | SAMR1 | Male   | 101    |

---

**Supplementary Table 2. Autopsy findings in SAMP8 and SAMR1 mice.**

|                                       | <b>SAMP8</b>                                                                                                     | <b>SAMR1</b>                                                                          |
|---------------------------------------|------------------------------------------------------------------------------------------------------------------|---------------------------------------------------------------------------------------|
| Probable causes of death              | Unknown                                                                                                          | Unknown                                                                               |
|                                       | Lymphoma                                                                                                         | Lung tumor                                                                            |
|                                       | Intestinal necrosis and torsion                                                                                  | Ischemia                                                                              |
|                                       | Bronchitis and pleuritic                                                                                         | Lymphoma                                                                              |
| Postmortem histopathological findings | Lymphoma and leukemia with infiltration in thymus, liver, spleen, pleura, kidney, lymph nodes and perirenal fat. | Benign cyst in peritoneum                                                             |
|                                       | Steatosis in liver.                                                                                              | Papillary adenocarcinoma in lung                                                      |
|                                       | Intestinal abscesses.                                                                                            | Benign tumor in cecum                                                                 |
|                                       | Intestinal torsion and necrosis.                                                                                 | Abscess in colon                                                                      |
|                                       | Remains of hair in the intestine. Splenomegaly.                                                                  | Sarcoma                                                                               |
|                                       | Thymus thickened by tumor or reactive process.                                                                   | Ulcer                                                                                 |
|                                       | Brain with little mass.                                                                                          | Infiltration of lymphoid tumor in liver, spleen, cervical area, lymph nodes and colon |
|                                       | Neurofibrillary tangles and amyloid plaques in the brain.                                                        | Neurofibrillary tangles in brain.                                                     |
